# Supplementary material for: Assessment of wafer scale MoS2 atomic layers grown by metal–organic chemical vapor deposition using organo-metal, organo-sulfide, and H2S precursors
Source: Royal Society of Chemistry journal article supplement (doi:10.1039/d4ra04279d), 2024-01-01
Supplement: d4ra04279d1.pdf [file d4ra04279d1.pdf]

## Assessment of Wafer Scale MoS<sub>2</sub> Atomic Layers Grown by Metal-Organic Chemical Vapor Deposition Using Organo-metal, Organo-sulfide, and H<sub>2</sub>S Precursors

Michael Curtis<sup>1</sup>, Olivia Maryon<sup>1</sup>, Nicholas Mckibben<sup>1</sup>, Josh Eixenberger<sup>2,3</sup>, Chen Chen<sup>4,5</sup>, Karthik Chinnathambi<sup>6</sup>, Sergej Pasko<sup>7</sup>, Salim El Kazzi<sup>7</sup>, Joan M. Redwing<sup>4,5</sup>, David Estrada<sup>1,3,8,\*</sup>

1. *Micron School of Materials Science and Engineering, Boise State University, Boise, ID, 83725*
  2. *Department of Physics, Boise State University, Boise, ID, 83725*
  3. *Center for Advanced Energy Studies, Boise State University, Boise, ID, 83725*
  4. *2D Crystal Consortium Materials Innovation Platform, Materials Research Institute, The Pennsylvania State University, University Park, PA 16802, USA*
  5. *Department of Materials Science and Engineering, The Pennsylvania State University, University Park, PA 16802, USA*
  6. *Boise State Center for Materials Characterization, Boise State University, Boise, ID, 83725*
  7. *AIXTRON SE, Herzogenrath, Germany*
  8. *Idaho National Laboratory, Idaho Falls, ID, 83401*
- \*Corresponding Author: [daveestrada@boisestate.edu](mailto:daveestrada@boisestate.edu)*

Supplementary Information

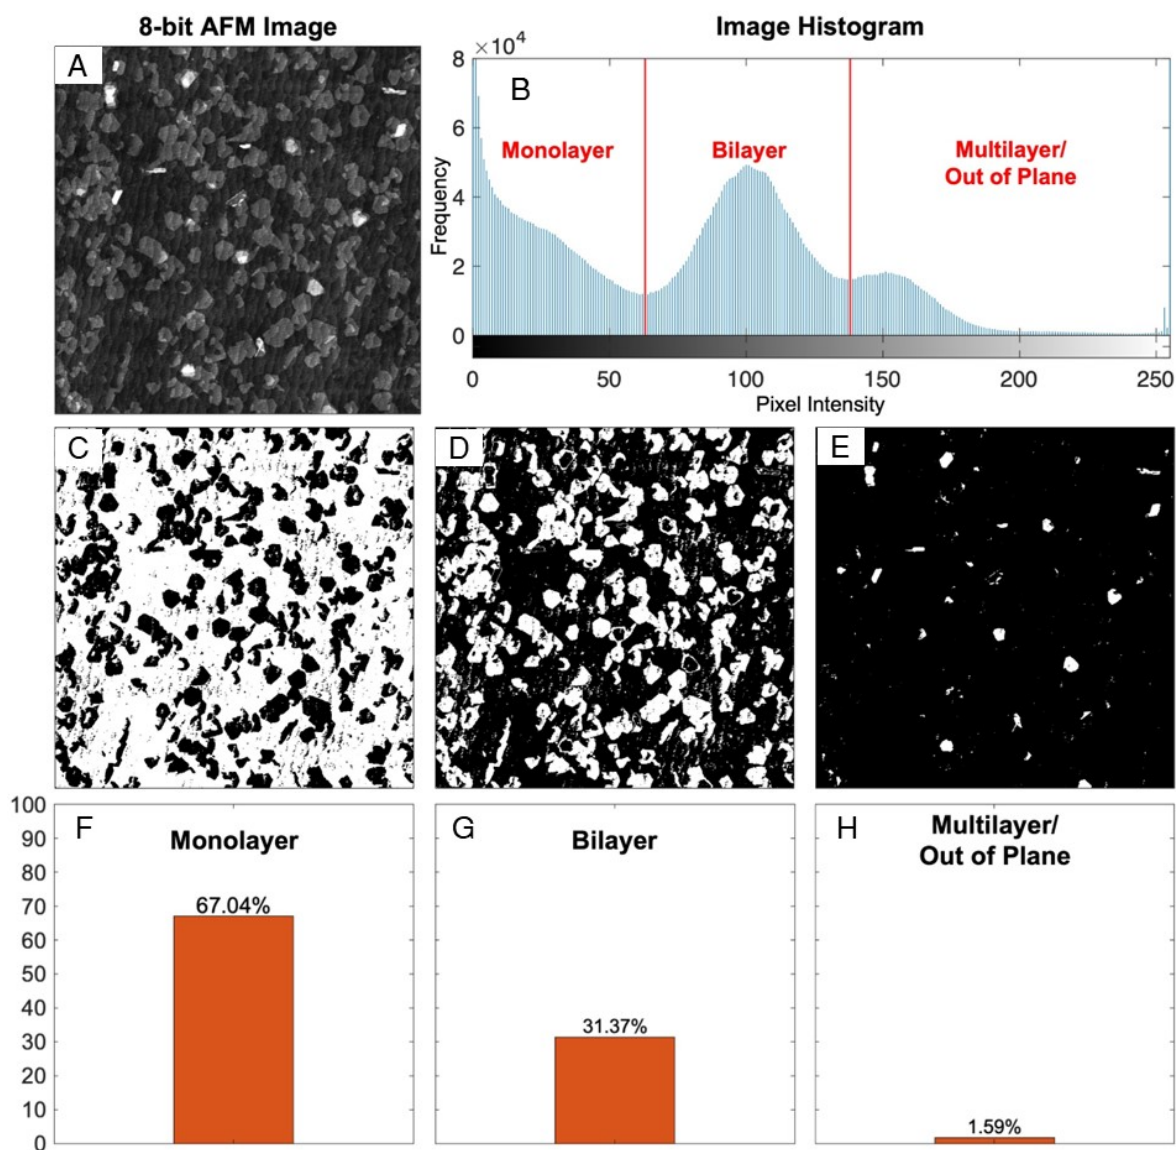

**Figure 1.** Output from image processing script used to analyze layer coverage. Monolayer coalescence is confirmed with Raman spectroscopy. Based on the assumption of the monolayer base, additional domains are bi-multilayer coverages. A: Cropped AFM input image. B: Pixel intensity histogram of input image. C-E: Threshold regions, white pixels count towards region percentage. F-H: Pixel count percentages by coverage type.

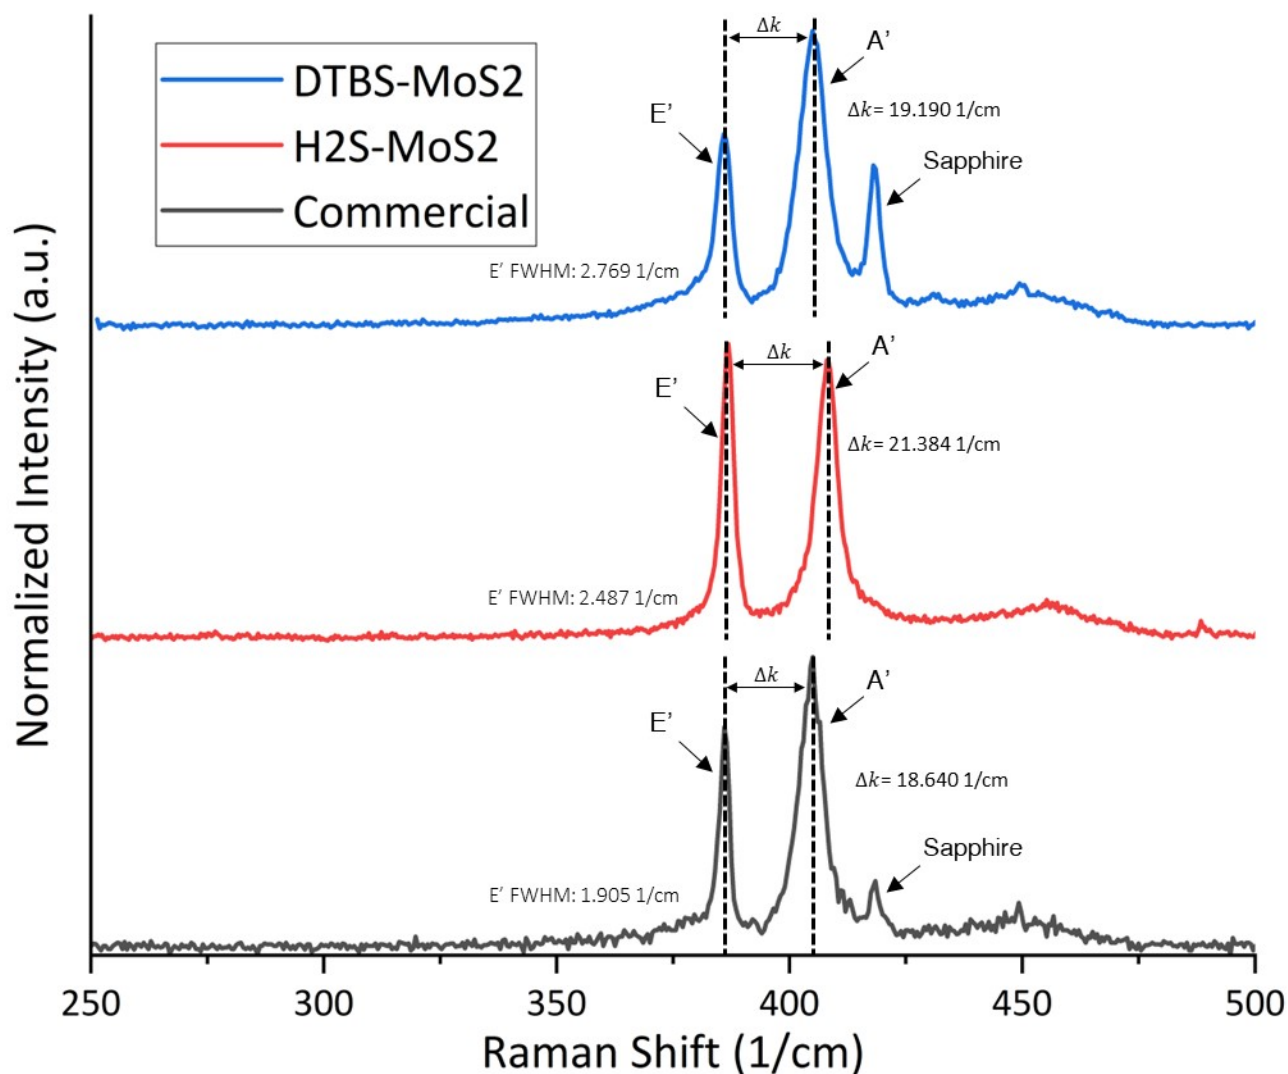

**Figure 2.** Comparison of Raman spectra MOCVD grown samples to commercially available MoS<sub>2</sub>. For both experimental samples, a random spectrum was chosen from the top quartile of the 400 spectra maps rank ordered by in-plane FWHM. The FWHM of the in-plane Raman mode on the commercially available sample is noticeably smaller than that of the H<sub>2</sub>S or DTBS-grown samples. The primary peak separation of DTBS-grown sample is closer to the value from the commercial sample, due to its decreased bilayer.

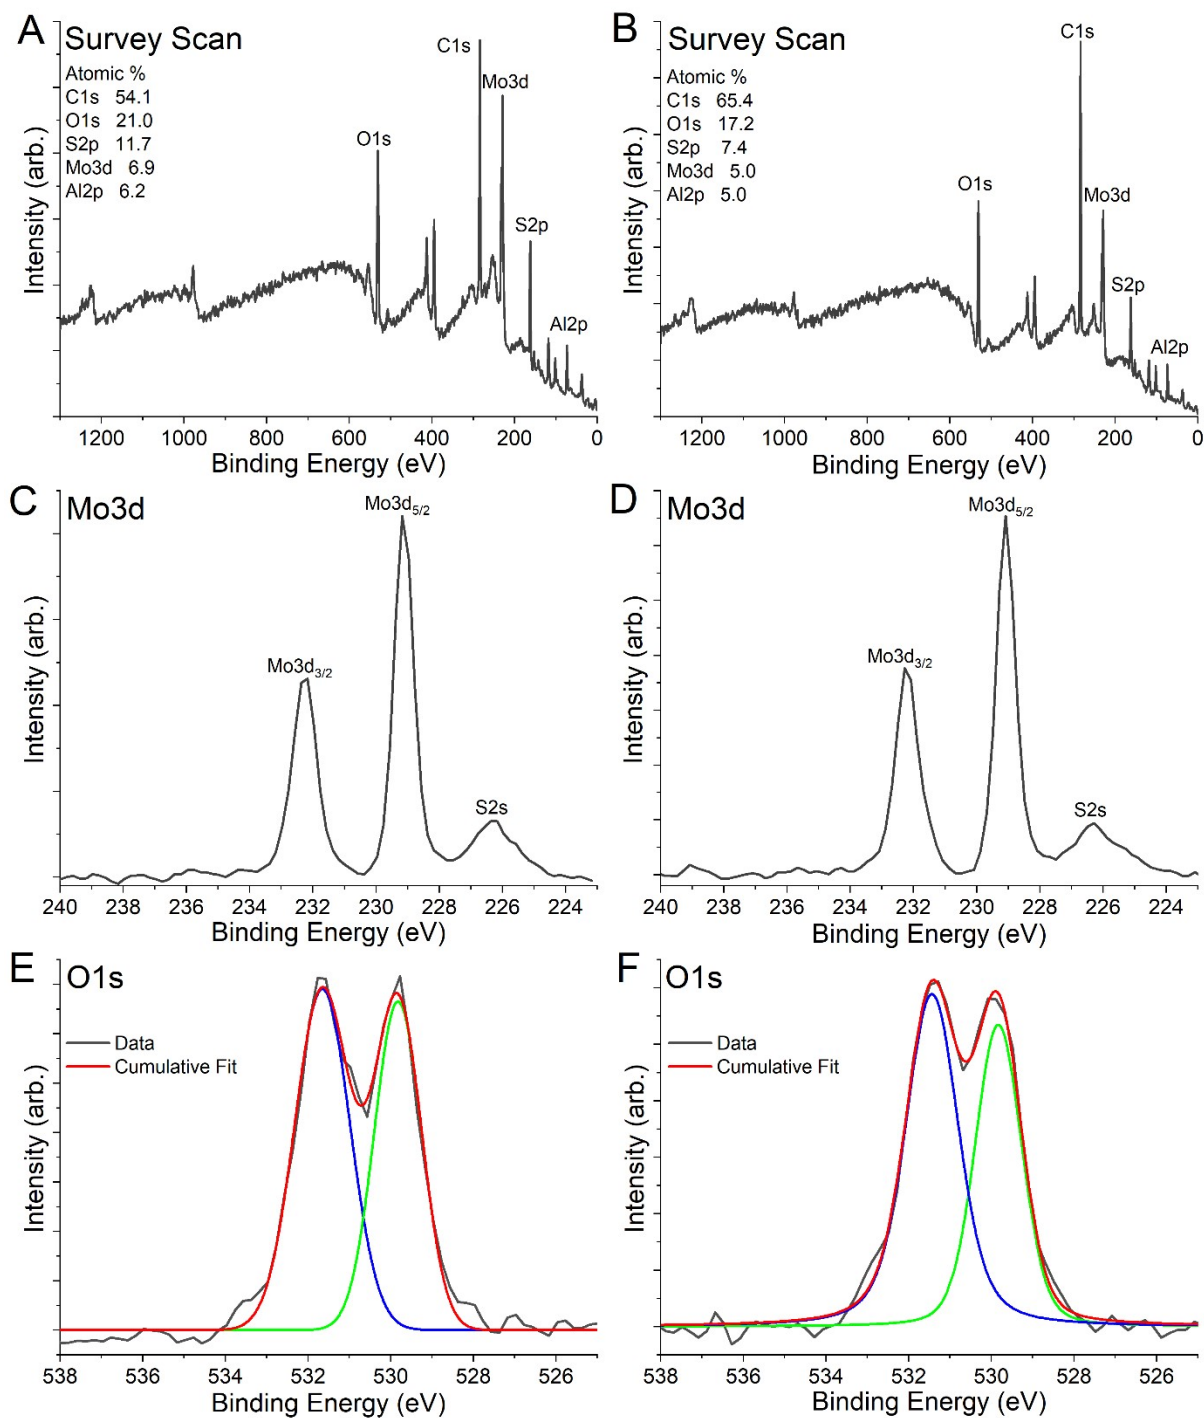

**Figure 3.** XPS spectra of MoS<sub>2</sub> samples grown use the H<sub>2</sub>S process (1st column: A, C, & E) and the DTBS process (2nd column: B, D, & F). A-B: XPS survey scan data from each sample with the associated atomic concentrations. As the MoS<sub>2</sub> samples are atomically thin, spectra includes elements from the substrate (sapphire). Samples from the H<sub>2</sub>S process (1st column) show considerably less carbon species retained from the precursors. While the samples contain a significant quantity of oxygen, oxygen species are related to the sapphire substrate and retained carbonyl species (E-F).
